# Supplementary material
Source: Springer Nature journal article supplement (https://www.springermedizin.de/resource/supplementary/12885_2013_4153_MOESM10_ESM.pdf/9465582)

$p < 0.0001$

Ratio of cancerous tissue mRNA level to  
histopathologically unchanged mRNA level

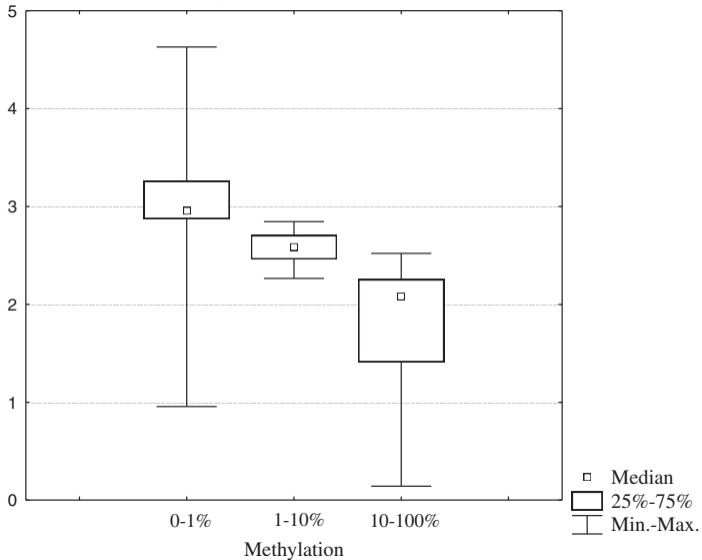

Supplement: MOESM10 [file 9465582]
